# Supplementary material
Source: ML conference proceedings conference paper supplement (https://proceedings.mlr.press/v119/kadri20a.html)
Supplement: Supplementary file [file kadri20a-supp.pdf]

---

# Supplementary Material for Partial Trace Regression and Low-Rank Kraus Decomposition

---

Hachem Kadri<sup>1</sup> Stéphane Ayache<sup>1</sup> Riikka Huusari<sup>2</sup> Alain Rakotomamonjy<sup>3,4</sup> Liva Ralaivola<sup>4</sup>

In this supplementary material, we prove Lemma 3 and Theorem 4 in Section 2.3 of the main paper. Let us first recall the definition of pseudo-dimension.

**Definition 1** (Shattering *Mohri et al., 2018, Def. 10.1*)

Let  $G$  be a family of functions from  $X$  to  $\mathbb{R}$ . A set  $\{x_1, \dots, x_m\} \subset X$  is said to be shattered by  $G$  if there exist  $t_1, \dots, t_m \in \mathbb{R}$  such that,

$$f(x) = \left| \left\{ \begin{bmatrix} \text{sign}(g(x_1) - t_1) \\ \vdots \\ \text{sign}(g(x_m) - t_m) \end{bmatrix} : g \in G \right\} \right| = 2^m.$$

**Definition 2** (pseudo-dimension *Mohri et al., 2018, Def. 10.2*)

Let  $G$  be a family of functions from  $X$  to  $\mathbb{R}$ . Then, the pseudo-dimension of  $G$ , denoted by  $Pdim(G)$ , is the size of the largest set shattered by  $G$ .

In the following we consider that the expected loss of any hypothesis  $h \in \mathcal{F}$  is defined by  $R(h) = \mathbb{E}_{(X,Y)}[\ell(Y, h(X))]$  and its empirical loss by  $\hat{R}(h) = \frac{1}{l} \sum_{i=1}^l \ell(Y_i, h(X_i))$ . To prove Lemma 3 and Theorem 4, we need the following two results.

**Theorem 1** (*Srebro, 2004, Theorem 35*)

The number of sign configurations of  $m$  polynomials, each of degree at most  $d$ , over  $n$  variables is at most  $\left(\frac{4edm}{n}\right)^n$  for all  $m > n > 2$ .

**Theorem 2** (*Mohri et al., 2018, Theorem 10.6*)

Let  $H$  be a family of real-valued functions and let  $G = \{x \mapsto L(h(x), f(x)) : h \in H\}$  be the family of loss functions associated to  $H$ . Assume that the pseudo-dimension of

<sup>1</sup>Aix-Marseille University, CNRS, LIS, Marseille, France

<sup>2</sup>Helsinki Institute for Information Technology HIIT, Department of Computer Science, Aalto University, Espoo, Finland <sup>3</sup>Université Rouen Normandie, LITIS, Rouen, France <sup>4</sup>Criteo AI Lab, Paris, France. Correspondence to: Hachem Kadri <hachem.kadri@univ-amu.fr>.

*Proceedings of the 37<sup>th</sup> International Conference on Machine Learning*, Online, PMLR 119, 2020. Copyright 2020 by the author(s).

$G$  is bounded by  $d$  and that the loss function  $L$  is bounded by  $M$ . Then, for any  $\delta > 0$ , with probability at least  $\delta$  over the choice of a sample of size  $m$ , the following inequality holds for all  $h \in H$ :

$$R(h) \leq \hat{R}(h) + M \sqrt{\frac{2d \log\left(\frac{em}{d}\right)}{m}} + M \sqrt{\frac{\log\left(\frac{1}{\delta}\right)}{2m}}.$$

## 1. Proof of Lemma 3

We now prove Lemma 3 in Section 2.3 of the main paper.

**Lemma 3** The pseudo-dimension of the real-valued function class  $\tilde{\mathcal{F}}$  with domain  $\mathbb{M}_p \times [q] \times [q]$  defined by

$$\tilde{\mathcal{F}} = \{(X, s, t) \mapsto (\Phi(X))_{st} : \Phi(X) = \sum_{j=1}^r A_j X A_j^\top\}$$

is upper bounded by  $pqr \log\left(\frac{8epq}{r}\right)$ .

**Proof:** It is well known that the pseudo-dimension of a vector space of real-valued functions is equal to its dimension (*Mohri et al., 2018, Theorem 10.5*). Since  $\tilde{\mathcal{F}}$  is a subspace of the  $p^2 q^2$ -dimensional vector space

$$\{(X, s, t) \mapsto (\Phi(X))_{st} : \Phi \in \mathcal{L}(\mathbb{M}_p; \mathbb{M}_q)\}$$

of real-valued functions with domain  $\mathbb{M}_p \times [q] \times [q]$  the pseudo-dimension of  $\tilde{\mathcal{F}}$  is bounded by  $p^2 q^2$ .

Now, let  $m \leq p^2 q^2$  and let  $\{(X_k, s_k, t_k)\}_{k=1}^m$  be a set of points that are pseudo-shattered by  $\tilde{\mathcal{F}}$  with thresholds  $t_1, \dots, t_m \in \mathbb{R}$ . Then for each binary labeling  $(u_1, \dots, u_m) \in \{-, +\}^m$ , there exists  $\tilde{\Phi} \in \tilde{\mathcal{F}}$  such that  $\text{sign}(\tilde{\Phi}(X_k, s_k, t_k) - v_k) = u_k$ . Any function  $\tilde{\Phi} \in \tilde{\mathcal{F}}$  can be written as

$$\tilde{\Phi}(X, s, t) = \left( \sum_{j=1}^r A_j X A_j^\top \right)_{st}, \quad (1)$$

where  $A_j \in \mathbb{M}_{q \times p}, \forall j \in [r]$ . If we consider the  $pqr$  entries of  $A_j, j = 1, \dots, r$ , as variables, the set  $\{\tilde{\Phi}(X_k, s_k, t_k) - v_k\}_{k=1}^m$  can be seen (using Eq. 1) as a set of  $m$  polynomials

of degree 2 over these variables. Applying Theorem 1 above, we obtain that the number of sign configurations, which is equal to  $2^m$ , is bounded by  $\left(\frac{8em}{pqr}\right)^{pqr}$ . The result follows since  $m \leq p^2q^2$ . ■

## 2. Proof of Theorem 4

In this section, we prove Theorem 4 in Section 2.3 of the main paper.

**Theorem 4** *Let  $\ell : \mathbb{M}_q \rightarrow \mathbb{R}$  be a loss function satisfying*

$$\ell(Y, Y') = \frac{1}{q^2} \sum_{s,t} \ell'(Y_{st}, Y'_{st})$$

*for some loss function  $\ell' : \mathbb{R} \rightarrow \mathbb{R}^+$  bounded by  $\gamma$ . Then for any  $\delta > 0$ , with probability at least  $1 - \delta$  over the choice of a sample of size  $l$ , the following inequality holds for all  $h \in \mathcal{F}$ :*

$$R(h) \leq \hat{R}(h) + \gamma \sqrt{\frac{pqr \log\left(\frac{8epq}{r}\right) \log\left(\frac{l}{pqr}\right)}{l}} + \gamma \sqrt{\frac{\log\left(\frac{1}{\delta}\right)}{2l}}.$$

**Proof:** For any  $h : \mathbb{M}_p \rightarrow \mathbb{M}_q$  we define  $\tilde{h} : \mathbb{M}_p \times [q] \times [q] \rightarrow \mathbb{R}$  by  $\tilde{h}(X, s, t) = (h(X))_{st}$ . Let  $\mathcal{D}$  denote the distribution of the input-output data. We have

$$\begin{aligned} R(h) &= \mathbb{E}_{(X,Y) \sim \mathcal{D}}[\ell(Y, h(X))] \\ &= \frac{1}{q^2} \sum_{s,t} \mathbb{E}_{(X,Y) \sim \mathcal{D}}[\ell'(Y_{st}, h(X)_{st})] \\ &= \mathbb{E}_{\substack{(X,Y) \sim \mathcal{D} \\ s,t \sim \mathcal{U}(q)}}[\ell'(Y_{st}, \tilde{h}(X, s, t))], \end{aligned}$$

where  $\mathcal{U}(q)$  denotes the discrete uniform distribution on  $[q]$ . It follows that  $R(h) = R(\tilde{h})$ . By the same way, we can show that  $\hat{R}(h) = \hat{R}(\tilde{h})$ . The generalization bound is then obtained using Theorem 2 above. ■

## References

- Mohri, M., Rostamizadeh, A., and Talwalkar, A. *Foundations of machine learning*. MIT press, 2018.
- Srebro, N. *Learning with matrix factorizations*. PhD thesis, MIT, 2004.
